# Supplementary material
Source: PubMed Central journal article supplement (PMC2719326)
Supplement: M109.010504_1.pdf [file M109.010504_1.pdf]

**TABLE S1.** Primers used in this study

---

| Sequences (5'-3')            | Use                                               |
|------------------------------|---------------------------------------------------|
| 1. AAGGACCAAGTAGCCAATGGG     | Rat TXNIP-ChoRE 5' ChIP primer                    |
| 2. GTGCTGGCCCGGAGG           | Rat TXNIP-ChoRE 3' ChIP primer                    |
| 3. GGAAGCCACTGAAGAGAGA       | Rat LPK-ChoRE 5' ChIP primer                      |
| 4. TGTATTTAGCCGAGGTGAGG      | Rat LPK-ChoRE 3' ChIP primer                      |
| 5. ACCATGCTTCACTGACATTCTGA   | Rat GAPDH 5' ChIP control primer                  |
| 6. GGTCTGCCTCCCTGCTAACC      | Rat GAPDH 3' ChIP control primer                  |
| 7. CGAGTCAAAGCCGTCAGGAT      | Rat TXNIP 5' qPCR/modified histone 5' ChIP primer |
| 8. TTCATAGCGCAAGTAGTCCAAGGT  | Rat TXNIP 3' qPCR/modified histone 3' ChIP primer |
| 9. CTCGCGTGGCTCTTCTG         | Human TXNIP-ChoRE 5' ChIP primer                  |
| 10. GCAGGAGGCGGAAACGT        | Human TXNIP-ChoRE 3' ChIP primer                  |
| 11. CGGGATTGTCTGCCCTAATTAT   | Human GAPDH 5' ChIP control primer                |
| 12. GCACGGAAGGTCACGATGT      | Human GAPDH 3' ChIP control primer                |
| 13. TAGTGGCCATGGCGCG         | Mouse ChREBP 5' cloning primer                    |
| 14. TCACCAGGATTATAATGGTCTCCC | Mouse ChREBP 3' cloning primer                    |
| 15. CAAAGCAACCACGCTTCAGA     | Rat ChREBP 5' qPCR primer                         |
| 16. CCCGTCCTGCTGTAGCAT       | Rat ChREBP 3' qPCR primer                         |
| 17. CGAAACATGACCAAATCGTACAG  | Human NeuroD 5' cloning primer                    |
| 18. TGAAACTGGCGTGCCTCTAAT    | Human NeuroD 3' cloning primer                    |

---

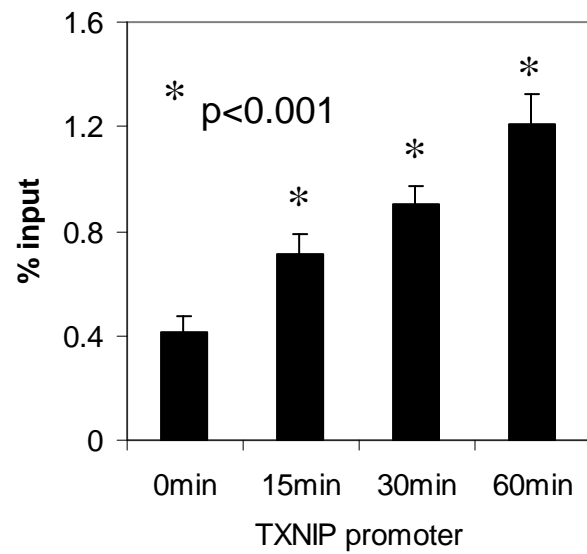

**Figure S1: Early time course of glucose-induced recruitment of ChREBP to TXNIP promoter.** INS-1 cells were incubated at 25 mM glucose for the indicated time periods prior to ChIP. Bars represent means  $\pm$ SEM of at least three independent ChIP assays.
